# Supplementary material
Source: Research Square preprint supplement (doi:10.21203/rs.3.rs-8810437/v1)
Supplement: Supplementary file 1 [file 7e018012f5a06f025b61d1dc.docx]

**Table (1):** Comparison between Participants with Normal Cognition and with Mild Cognitive Impairment (MCI) regarding Age:

| **Variables** | **Cognitive State** | | | | **Independent sample t-test** | **P-value** |
| --- | --- | --- | --- | --- | --- | --- |
| **Normal** | | **MCI** | |
| **Mean** | **+ SD** | **Mean** | **+ SD** |
| Age | 58.10 | 3.63 | 58.37 | 4.63 | -0.248 | 0.805 |

**Table (2):** Comparison between Participants with Normal Cognition and Mild Cognitive Impairment (MCI) regarding PTA hearing threshold and Speech Discrimination Percentage:

| **Variables** | **Cognitive Impairment** | | | | **Indep -ndent sample t-test** | **P-value** |
| --- | --- | --- | --- | --- | --- | --- |
| **Normal** | | **MCI** | |
| **Mean** | **+ SD** | **Mean** | **+ SD** |
| **250Hz** | 10.67 | 5.00 | 12.92 | 5.07 | -2.449 | 0.016* |
| **500Hz** | 13.42 | 5.00 | 15.50 | 5.80 | -2.107 | 0.037* |
| **1KHz** | 18.33 | 4.93 | 20.83 | 6.32 | -2.416 | 0.017* |
| **2KHz** | 21.17 | 5.70 | 22.75 | 5.93 | -1.491 | 0.139 |
| **4KHz** | 24.83 | 8.18 | 25.08 | 6.67 | 0.063 | 0.855 |
| **8KHz** | 26.25 | 13.04 | 30.00 | 10.42 | 0.087 | 0.084 |
| **SRT** | 13.00 | 3.82 | 14.83 | 4.87 | 0.073 | 0.023* |
| **Speech Discrimination** | 99.60 | 1.76 | 100.00 | .00 | 0.000 | 0.083 |

(*) Statistically significant at P<0.05

**Table (3):** Comparison between Participants with Normal Cognition and Mild Cognitive Impairment (MCI) Regarding Speech Perception in Noise (SPIN) and Gap-In-Noise (GIN) Performance:

| **Variables** | **Cognitive Impairment** | | | | **Independent sample t-test** | **P-value** |
| --- | --- | --- | --- | --- | --- | --- |
| **Normal** | | **MCI** | |
| **Mean** | **+ SD** | **Mean** | **+ SD** |
| **SPIN** | 85.40 | 6.54 | 76.93 | 5.67 | 7.575 | 0.000** |
| **GIN** | 90.17 | 10.79 | 84.18 | 17.67 | 2.239 | 0.027* |

(*) Statistically significant at P<0.05

(**) Highly statistically significant at P<0.01

**Table (4):** Diagnostic Accuracy of Speech Perception in Noise (SPIN) Tests for Differentiating Mild Cognitive Impairment (MCI) from Normal Cognition:

| **Area Under the Curve** | | | | | |
| --- | --- | --- | --- | --- | --- |
| **Test Result Variable(s)** | **Area** | **Std. Errora** | **Asymptotic Sig.b** | **Asymptotic 95% Confidence Interval** | |
| **Lower Bound** | **Upper Bound** |
| SPIN | .852 | .036 | .000** | .782 | .922 |
| a. Under the nonparametric assumption | | | | | |
| b. Null hypothesis: true area = 0.5 | | | | | |

(**) Highly statistically significant at P<0.01

**Table (5):** Optimal Cutoff Points for Speech Perception in Noise (SPIN) Tests in Differentiating Mild Cognitive Impairment (MCI) from Normal Cognition:

| **Coordinates of the Curve** | | |
| --- | --- | --- |
| **Test Result Variable(s): ALL SPIN** | | |
| **Positive if Less Than or Equal Toa** | **Sensitivity** | **1 - Specificity** |
| 59.0000 | .000 | .000 |
| 62.0000 | .017 | .000 |
| 66.0000 | .067 | .033 |
| 70.0000 | .100 | .033 |
| 74.0000 | .250 | .033 |
| 78.0000 | .500 | .117 |
| 82.0000 | .850 | .267 |
| 86.0000 | .983 | .417 |
| 90.0000 | 1.000 | .800 |
| 94.0000 | 1.000 | .950 |
| 97.0000 | 1.000 | 1.000 |
| The test result variable(s): ALL SPIN contains at least one tie between the positive and negative actual state groups. | | |
| a. The smallest cutoff value is the minimum observed test value minus one, and the biggest is the maximum observed test value plus one. The remaining cutoff values are the averages of two consecutive ordered observed test values. | | |

**Table (6):** Diagnostic Accuracy of Gaps-in-Noise (GIN) Tests for Differentiating Mild Cognitive Impairment (MCI) from Normal Cognition:

| **Area Under the Curve** | | | | | |
| --- | --- | --- | --- | --- | --- |
| **Test Result Variable(s)** | **Area** | **Std. Errora** | **Asymptotic Sig.b** | **Asymptotic 95% Confidence Interval** | |
| **Lower Bound** | **Upper Bound** |
| GIN | .574 | .053 | .160 | .470 | .678 |
| a. Under the nonparametric assumption | | | | | |
| b. Null hypothesis: true area = 0.5 | | | | | |

The GIN test has poor to fair discriminatory ability suggesting that the GIN test alone has limited diagnostic value for identifying MCI.

**Table (7):** Optimal Cutoff Points for Gaps-in-Noise (GIN) Tests in Differentiating Mild Cognitive Impairment (MCI) from Normal Cognition:

| **Coordinates of the Curve** | | |
| --- | --- | --- |
| **Test Result Variable(s): ALL GIN** | | |
| **Positive if Less Than or Equal Toa** | **Sensitivity** | **1 - Specificity** |
| 49.0000 | .000 | .000 |
| 58.5000 | .100 | .000 |
| 75.0000 | .333 | .083 |
| 91.5000 | .517 | .500 |
| 101.0000 | 1.000 | 1.000 |
| The test result variable (s): ALL GIN has at least one tie between the positive actual state group and the negative actual state group. | | |
| a. The smallest cutoff value is the minimum observed test value minus 1, and the largest cutoff value is the maximum observed test value plus 1. All the other cutoff values are the averages of two consecutive ordered observed test values. | | |

**Table (8):** Agreement Between SPIN Results and MMSE:

| **Variables** | | | **Cognitive Impairment** | | **Total** | **Kappa** | **P-value** |
| --- | --- | --- | --- | --- | --- | --- | --- |
| **Normal** | **MCI** |
| **SPIN** | **Normal** | No. | 35 | 1 | 36 | 0.567 | <0.001 |
| % | 58.3% | 1.7% | 30.0% |
| **Abnormal** | No. | 25 | 59 | 84 |
| % | 41.7% | 98.3% | 70.0% |
| **Total** | | No. | 60 | 60 | 120 |
| % | 100.0% | 100.0% | 100.0% |

**Table (9):** Agreement Between GIN Results and MMSE:

| **Variables** | | | **Cognitive Impairment** | | **Total** | **Kappa** | **P-value** |
| --- | --- | --- | --- | --- | --- | --- | --- |
| **Normal** | **MCI** |
| **GIN** | **Normal** | No. | 60 | 54 | 114 | 0.100 | 0.012* |
| % | 100.0% | 90.0% | 95.0% |
| **Abnormal** | No. | 0 | 6 | 6 |
| % | 0.0% | 10.0% | 5.0% |
| **Total** | | No. | 60 | 60 | 120 |
| % | 100.0% | 100.0% | 100.0% |

**Table (10):** Correlation Between SPIN and Various PTA hearing threshold & Cognitive Variables:

| **Variables** | **SPIN** | |
| --- | --- | --- |
| **r** | **P-value** |
| Age | -.142 | 0.122 |
| 250Hz | -.139 | 0.13 |
| 500Hz | -.264 | 0.004** |
| 1KHz | -.215 | 0.018* |
| 2KHz | -.119 | 0.196 |
| 4KHz | -.118 | 0.2 |
| 8KHz | -.178 | 0.05* |
| SRT | -.236 | 0.01** |
| Speech Discrimination | .025 | 0.784 |
| MMSE | .457 | 0.000** |
| GIN | .263 | 0.004** |

(*) Statistically significant at P<0.05

(**) Highly statistically significant at P<0.01

**Table (11):** Correlation Between GIN and Various PTA hearing threshold & Cognitive Variables:

| **Variables** | **GIN** | |
| --- | --- | --- |
| **r** | **P-value** |
| Age | -.013 | 0.887 |
| 250Hz | -.192 | 0.036* |
| 500Hz | -.154 | 0.094 |
| 1KHz | -.006 | 0.948 |
| 2KHz | -.040 | 0.663 |
| 4KHz | .065 | 0.478 |
| 8KHz | -.146 | 0.112 |
| SRT | -.241 | 0.008** |
| Speech Discrimination | .045 | 0.625 |
| MMSE | .235 | 0.071 |
| SPIN | .263 | 0.004** |

**Table (12):** Correlation Between MMSE and Various PTA hearing threshold & Cognitive Variables:

| **Variables** | **MMSE** | |
| --- | --- | --- |
| **r** | **P-value** |
| Age | -.047 | 0.721 |
| 250Hz | -.253 | 0.051 |
| 500Hz | -.182 | 0.164 |
| 1KHz | -.139 | 0.29 |
| 2KHz | -.293 | 0.023* |
| 4KHz | .087 | 0.508 |
| 8KHz | -.186 | 0.154 |
| SRT | -.300 | 0.020* |
| Speech Discrimination | -.100 | 0.446 |
| SPIN | .457 | 0.000** |
| GIN | .235 | 0.071 |

(*) Statistically significant at P<0.05

(**) Highly statistically significant at P<0.01
